# Supplementary material for: Ligand-Doped Copper Oxo-hydroxide Nanoparticles are Effective Antimicrobials
Source: PubMed Central journal article supplement (PMC5908776; doi:10.1186/s11671-018-2520-7), 2018-04-19
Supplement: 11671_2018_2520_MOESM4_ESM.pdf [file 11671_2018_2520_MOESM4_ESM.pdf]

**Additional 4. Particle size stability of aquated CHAT between 0 and 2 years**

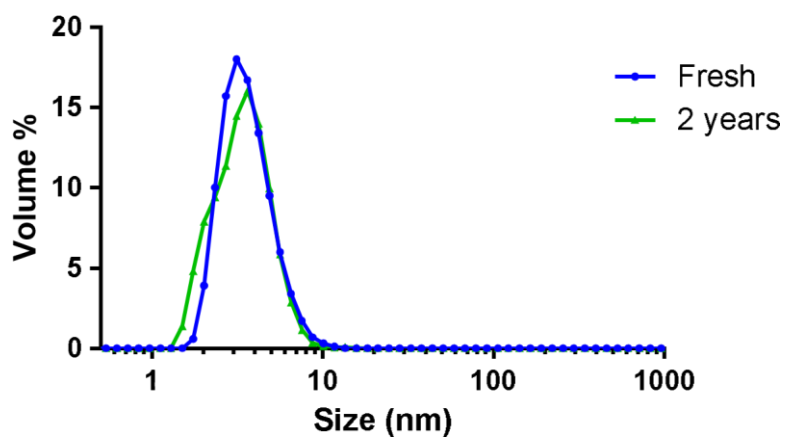

**Figure S1.** Hydrodynamic particle size of 40mM CHAT in water (as per conditions of synthesis), when freshly prepared and when 2 years old by Dynamic Light Scattering.
