# Supplementary material for: Ligand-Doped Copper Oxo-hydroxide Nanoparticles are Effective Antimicrobials
Source: PubMed Central journal article supplement (PMC5908776; doi:10.1186/s11671-018-2520-7), 2018-04-19
Supplement: 11671_2018_2520_MOESM5_ESM.pdf [file 11671_2018_2520_MOESM5_ESM.pdf]

**Additional file 5. Bacterial growth inhibition upon incubation with CuCl<sub>2</sub> and CHAT.**

Growth inhibition was obtained by comparing copper treated and untreated bacteria, as below:

$$\text{Growth Inhibition \%} = \left( \frac{OD_{\text{untreated}} - OD_{\text{Copper Treated}}}{OD_{\text{untreated}}} \right) \times 100$$

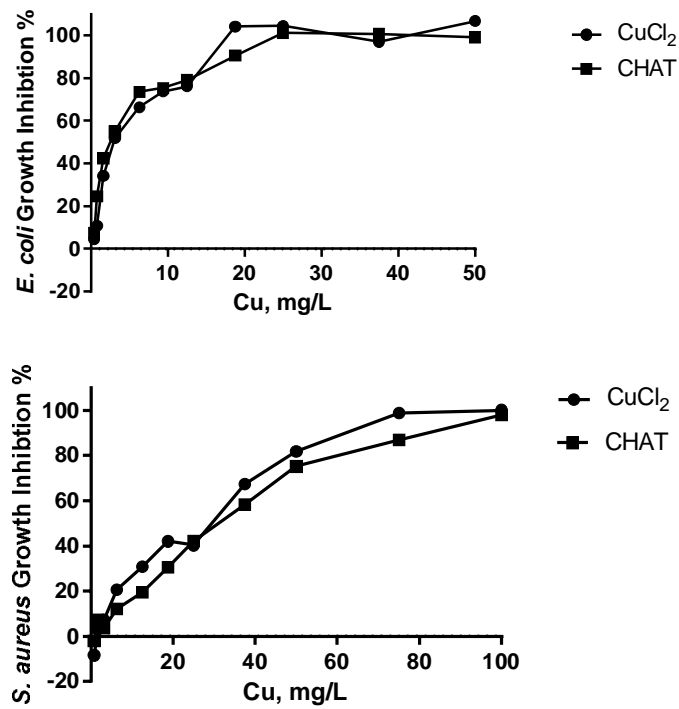

**Figure S2.** *E. coli* (top) and *S. aureus* (bottom) growth inhibition percentage upon incubation with several concentrations of CuCl<sub>2</sub> and CHAT in supplemented HMM for 6 hours and 9 hours, respectively.
